# Supplementary material
Source: PubMed Central journal article supplement (PMC8283671)
Supplement: jamaoncol-e211700-s001.pdf [file jamaoncol-e211700-s001.pdf]

## Supplementary Online Content

Doll KM, Romano SS, Marsh EE, Robinson WR. Estimated performance of transvaginal ultrasonography for evaluation of postmenopausal bleeding in a simulated cohort of Black and White women in the US. *JAMA Oncol*. Published online July 15, 2021. doi:10.1001/jamaoncol.2021.1700

**eTable 1.** List of *ICD-O-3* Codes Included to Calculate Endometrial Cancer Case Counts

**eTable 2.** Performance of TVUS ET Thresholds for Identifying Endometrial Cancer Among a Simulated Cohort of US Black and White Women With Postmenopausal Bleeding: Sensitivity Analysis by Submucosal Fibroid Prevalence

This supplementary material has been provided by the authors to give readers additional information about their work.

**eTable 1. List of ICD-O-3 codes included to calculate endometrial cancer case counts<sup>1, 2</sup>**

| <b>Endometrial Cancer Type</b> | <b>ICD-O-3 Code</b>                                                                            |
|--------------------------------|------------------------------------------------------------------------------------------------|
| Type I                         |                                                                                                |
| Endometrioid                   | 8260, 8262, 8384, 8140, 8210, 8380, 8381, 8382, 8383, 8440, 8480, 8481, 8482, 8560, 8570, 8050 |
| Type II                        |                                                                                                |
| Serous                         | 8450, 8441, 8460, 8461                                                                         |
| Carcinosarcoma                 | 8950, 8951, 8980, 8981                                                                         |
| Clear cell                     | 8313, 8310                                                                                     |

**eTable 2.** Performance of TVUS ET Thresholds for Identifying Endometrial Cancer Among a Simulated Cohort of U.S. Black and White Women with Postmenopausal Bleeding: Sensitivity Analysis by Submucosal Fibroid Prevalence

| Threshold                                                        | Sensitivity (95% CI)  | Specificity (95% CI)  | PPV (95% CI)          | NPV (95% CI)          | AUC (95% CI)        |
|------------------------------------------------------------------|-----------------------|-----------------------|-----------------------|-----------------------|---------------------|
| <b>Black Women: 63.6% of fibroids are submucosal<sup>3</sup></b> |                       |                       |                       |                       |                     |
| <b>3+ mm</b>                                                     | 65.4%<br>(64.0-66.8%) | 42.9%<br>(42.4-43.4%) | 11.3%<br>(10.9-11.7%) | 91.8%<br>(91.4-92.2%) | -                   |
| <b>4+ mm</b>                                                     | 60.9%<br>(59.4-62.3%) | 55.4%<br>(54.9-55.9%) | 13.2%<br>(12.7-13.6%) | 92.7%<br>(92.4-93.0%) | 0.60<br>(0.60-0.61) |
| <b>5+ mm</b>                                                     | 56.0%<br>(54.5-57.4%) | 67.1%<br>(66.7-67.6%) | 15.9%<br>(15.4-16.5%) | 93.2%<br>(92.9-93.5%) | -                   |
| <b>White women: 43.6% of fibroids are submucosal<sup>3</sup></b> |                       |                       |                       |                       |                     |
| <b>3+ mm</b>                                                     | 93.5%<br>(93.2-93.7%) | 21.3%<br>(21.1-21.4%) | 11.7%<br>(11.5-11.8%) | 96.7%<br>(96.6-96.8%) | -                   |
| <b>4+ mm</b>                                                     | 91.9%<br>(91.6-92.2%) | 39.2%<br>(39.1-39.4%) | 14.4%<br>(14.2-14.5%) | 97.8%<br>(97.7-97.8%) | 0.75<br>(0.75-0.75) |
| <b>5+ mm</b>                                                     | 89.9%<br>(89.5-90.2%) | 56.0%<br>(55.8-56.2%) | 18.5%<br>(18.3-18.7%) | 98.0%<br>(98.0-98.1%) | -                   |

#### References

1. Wise LA, Sponholtz TR, Rosenberg L, et al. History of uterine leiomyoma and risk of endometrial cancer in black women. *Cancer Causes Control*. 2016;27:545-552.
2. Doll KM, Winn A. Assessing Endometrial Cancer Risk Among US Women: Long-Term Trends using Hysterectomy-Adjusted Analysis. *Am J Obstet Gynecol*. 2019;221:e1-318.e319.
3. Moorman PG, Leppert P, Myers ER, Wang F. Comparison of characteristics of fibroids in African American and white women undergoing premenopausal hysterectomy. *Fertil Steril*. Mar 2013;99(3):768-776.e1. doi:10.1016/j.fertnstert.2012.10.039
